# Supplementary material for: Chemogenetic stimulation of the Gi pathway in astrocytes suppresses neuroinflammation
Source: PubMed Central journal article supplement (PMC8532135; doi:10.1002/prp2.822), 2021-10-22
Supplement: PRP2-9-e00822-s001.pdf [file PRP2-9-e00822-s001.pdf]

## Supplementary Figure S1

**A**

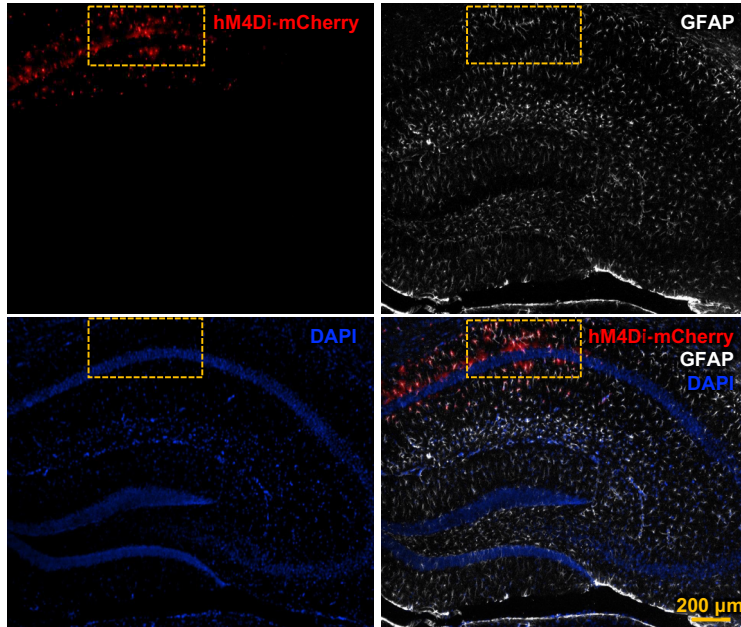

**B**

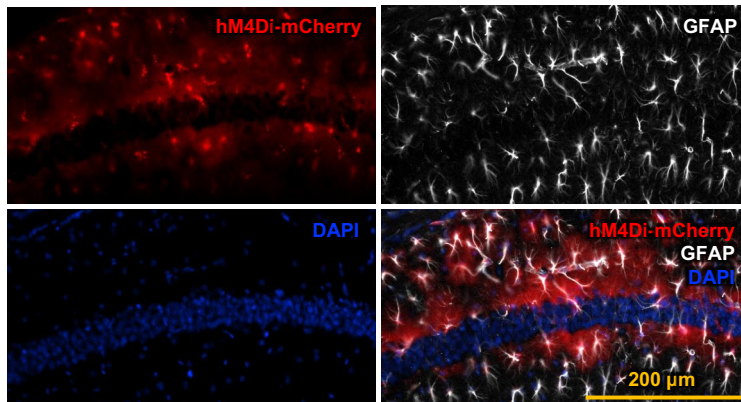

**Supplementary Figure S1. Selective expression of hM4Di-mCherry in the hippocampal astrocytes.** Representative low magnification images showing virus-induced hM4Di-mCherry expression (red), and immunostaining for GFAP (white), and DAPI (blue) in the hippocampal CA1 region (A). The dotted box (yellow) shows the hippocampal CA1 area magnified in Figure 1B (B).
