# Supplementary material for: Chemogenetic stimulation of the Gi pathway in astrocytes suppresses neuroinflammation
Source: PubMed Central journal article supplement (PMC8532135; doi:10.1002/prp2.822), 2021-10-22
Supplement: PRP2-9-e00822-s002.pdf [file PRP2-9-e00822-s002.pdf]

## Supplementary Figure S3

**A**

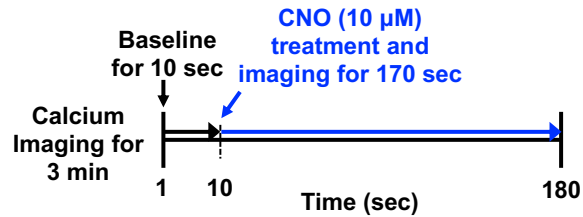

**B**

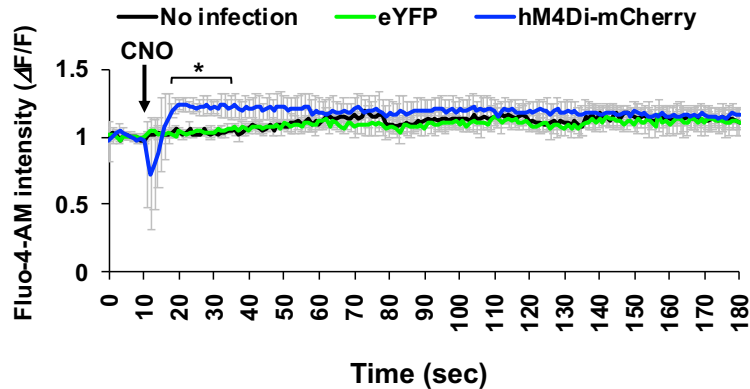

**Supplementary Figure S3. Chemogenetic stimulation of cultured astrocytes increases intracellular  $\text{Ca}^{2+}$  levels.** **A**, Experimental timeline. The hM4Di-expressing primary astrocytes loaded with Fluo-4-AM exhibited  $\text{Ca}^{2+}$  transients after treatment with CNO (10  $\mu\text{M}$ ). CNO was added at 10 s. **B**, Fluo-4-AM fluorescence traces ( $F-F_0$ )/ $F_0$  from primary astrocytes (180 s). The “no infection” and eYFP groups had unaltered  $\text{Ca}^{2+}$  levels. Results are expressed as the mean  $\pm$  SD ( $n = 5$ ). \* $p < 0.05$  between the indicated groups (one-way ANOVA).
