# Supplementary material for: Chemogenetic stimulation of the Gi pathway in astrocytes suppresses neuroinflammation
Source: PubMed Central journal article supplement (PMC8532135; doi:10.1002/prp2.822), 2021-10-22
Supplement: PRP2-9-e00822-s003.pdf [file PRP2-9-e00822-s003.pdf]

## Supplementary Figure S2

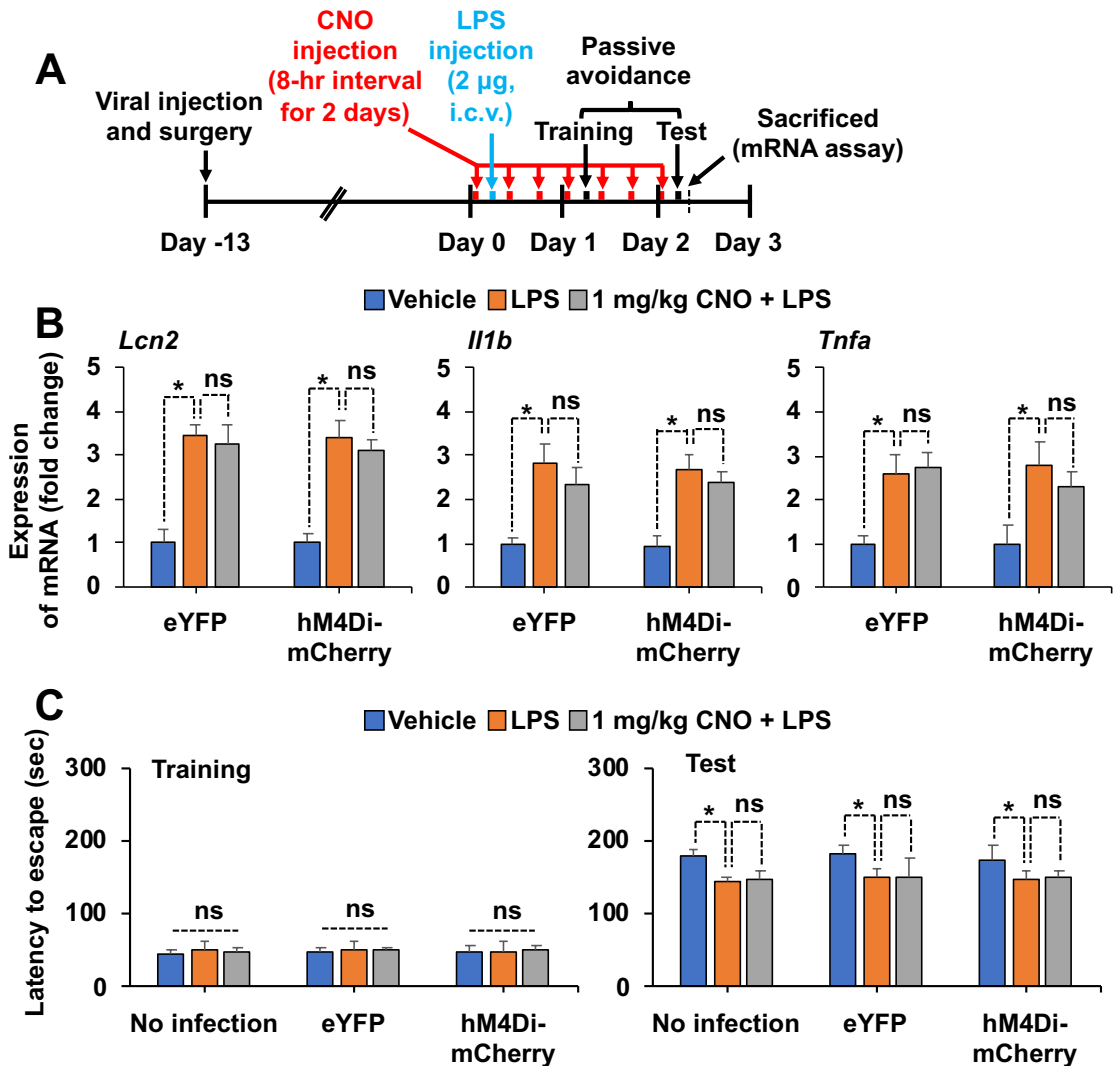

**Supplementary Figure S2. A low dose of CNO does not alter LPS-induced neuroinflammation or cognitive impairments in hM4Di-expressing mice.** (A) Schematic diagram showing the timeline of experimentation. (B) Total mRNA was extracted from the hippocampal tissues of each treatment group, and RT-PCR was performed to assess the expression levels of *Lcn2*, *Il1b*, and *Tnfa* mRNA. The graph displays quantitative results normalized to *Gapdh* mRNA levels. Results are expressed as means  $\pm$  SEM ( $n = 4$ ).  $*p < 0.05$  between the indicated groups (Student's *t*-test). (C) Cognitive impairment was evaluated using the passive avoidance test. Results are expressed as means  $\pm$  SEM ( $n = 4$ ).  $*p < 0.05$  between the indicated groups (one-way ANOVA with Bonferroni's post hoc test). hM4Di-mCherry, AAV5-hGFAP-hM4Di-mCherry; eYFP, AAV5-hGFAP-eYFP; ns, not significant.
